# Supplementary material for: A structural determinant required for RNA editing
Source: PubMed Central journal article supplement — Nucleic Acids Res. 2011 Mar 22;39(13):5669–81. doi: 10.1093/nar/gkr144 (PMC3141254; doi:10.1093/nar/gkr144), 2011-03-22
Supplement: supp_gkr144_Supplementarymaterials-Jin_Revised_.pdf [file supp_gkr144_Supplementarymaterials-Jin_Revised_.pdf]

## *Supplementary materials*

### **A structural determinant required for RNA editing**

Nan Tian<sup>1</sup>, Yun Yang<sup>1</sup>, Nora Sachsenmaier<sup>2</sup>, Dominik Muggenheimer<sup>3</sup>, Jingpei Bi<sup>1</sup>, Christina Waldsich<sup>2</sup>, Michael F. Jantsch<sup>3</sup>, Yongfeng Jin<sup>1\*</sup>

<sup>1</sup>Institute of Biochemistry, College of Life Sciences, Zhejiang University (Zijingang Campus), Hangzhou, Zhejiang, ZJ310058, P. R. of China,

<sup>2</sup>Department of Biochemistry and Cell Biology, Max F. Perutz Laboratories, University of Vienna, Austria

<sup>3</sup>Department of Chromosome Biology, Max F. Perutz Laboratories, University of Vienna, Austria

Correspondence (\*) should be addressed to Yongfeng Jin 0086-571-88206479(Tel); 0086-571-88206478(Fax); jinyf@zju.edu.cn(e-mail);

Abbreviations: Hsa (*Homo sapiens*); Ptr (*Pan troglodytes*); Mmul (*Macaca mulatta*); Cfa (*Canis familiaris*); Eca (*Equus caballus*); Bta (*Bos taurus*); Rno (*Rattus norvegicus*); Mmu (*Mus musculus*); Mdo (*Monodelphis domestica*); Oan (*Ornithorhynchus anatinus*); Gga (*Gallus gallus*); Ain (*Aspidoscelis inornata*); Cre (*Chinemys reevesii*); Xla (*Xenopus laevis*); Dre (*Danio rerio*); Fru (*Fugu rubripes*).

*Supplementary Figure 1-3*

*Supplementary Figure Table S1*

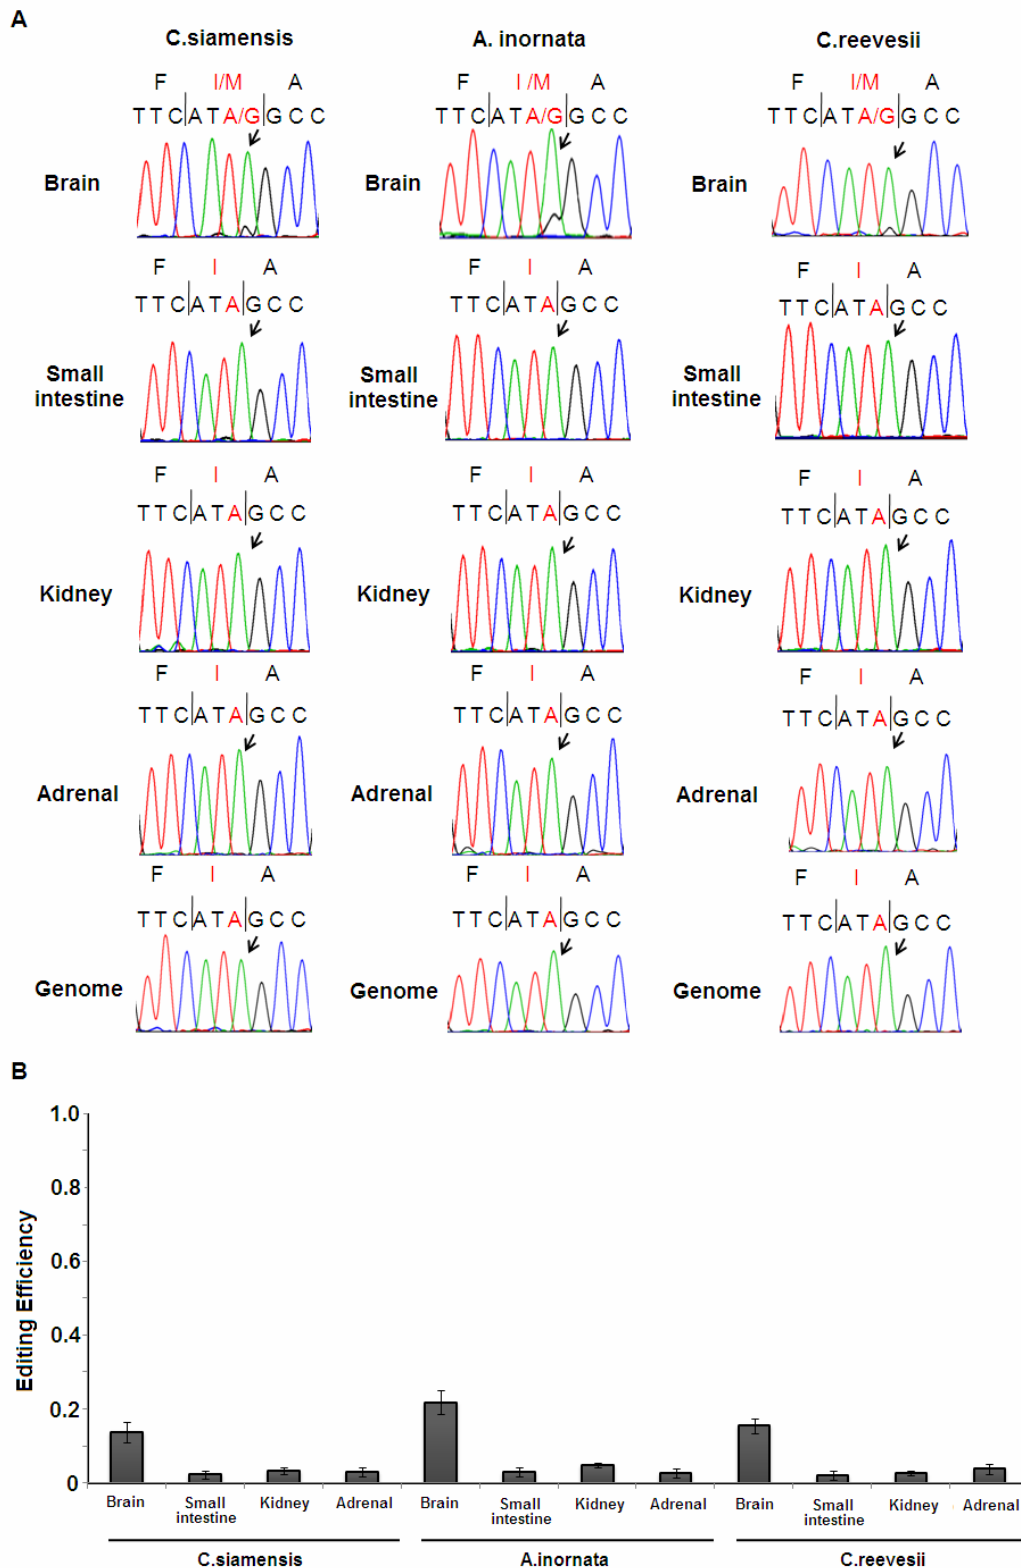

Figure S1 Tissue specificity regulation of Gabra-3 RNA expression and editing (I/M site)

(A) Bulk-sequence analysis of Gabra3 RT-PCR amplicons in different tissues. The chromatogram of RT-PCR from lizard (*Ain*), crocodile (*Csi*), and turtle (*Cre*) brain showed A-to-I editing as a mixed A/G peak. But in small intestine, kidney, adrenal of them is only A

signal in electropherogram trace. (B) Quantitative analyses of Gabra3 mRNA levels in brain, small intestine, kidney, adrenal of lizard, crocodile and turtle.

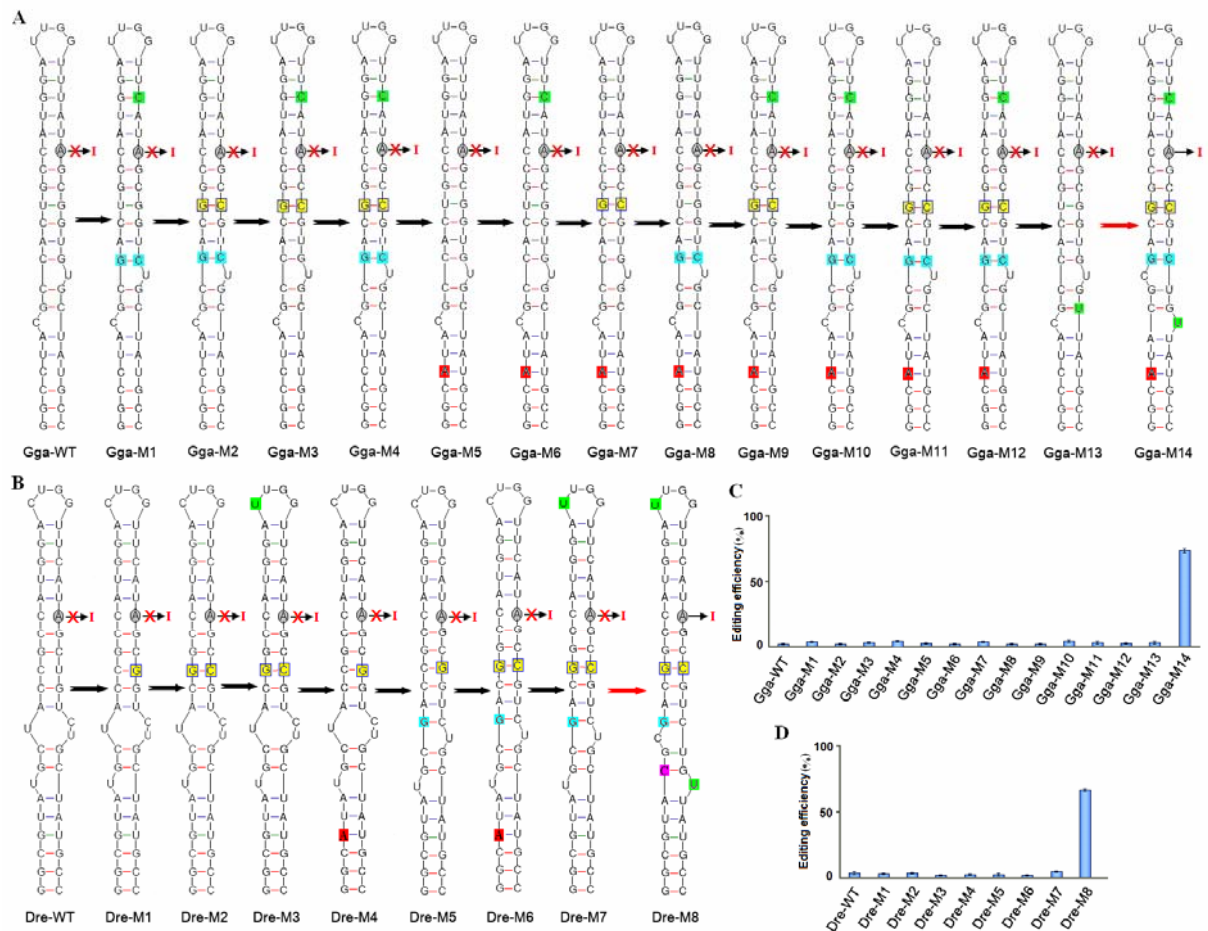

Figure S2. A series of mutants were mimicked a duplex structure to analyzed the effect on RNA editing. (A, B) Schematic diagrams of wild-type (WT) and mutant (M) minigene constructs involved in *in vivo* editing assays, based on chicken *Gabra1* (A) and *D. rerio* *Gabra5* (B). The edited A is circled, and the mutated nucleotides are shaded in colour. A red cross marks the failure to detect RNA editing (<5%). The conserved stems (Stem 1, 2, 3) are gradually mutated to be nearly or even completely identical to mammalian *gabrg3*. However, the resulting structure still failed to restore editing. By contrast, only mutation in combination with substitution in a nonconserved region could restore editing to wild-type level. (C, D) Editing levels of the various transcripts after injection *Xenopus* oocyte nuclear. RNA editing level of mutants was quantified using a restriction enzyme appropriate for each mutated editing site (see Methods).

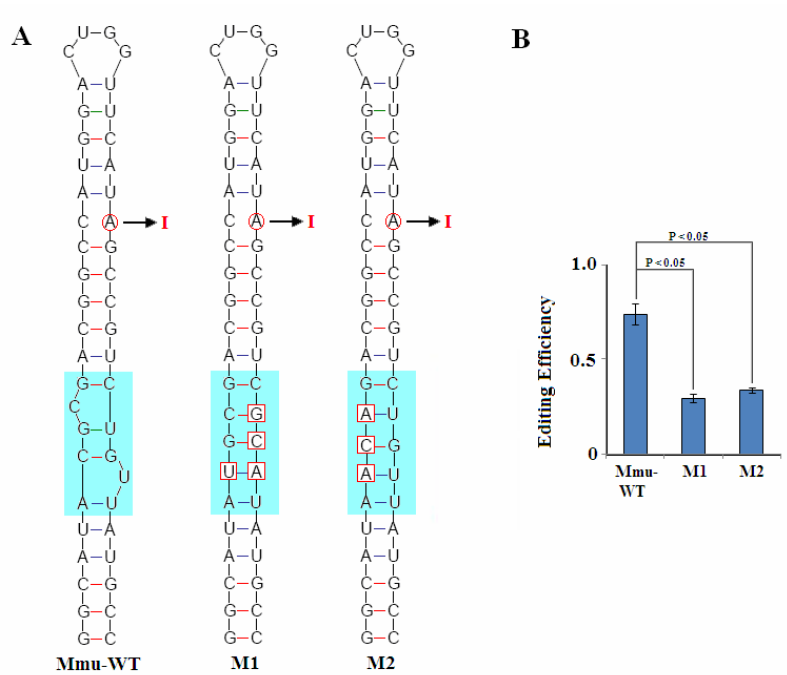

Figure S3. Perfect pairing at variable region by mutation led to marked decrease of editing level. (A) RNA secondary structure of wild-type (W) and mutant (M) minigene constructs involved in *in vivo* editing assays. The edited A is circled, and the mutated nucleotides are shaded in colour. (B) Editing levels of the various transcripts after injection *Xenopus* oocyte nuclear.

Table S1 Primers used for the RT-PCR and PCR analysis

| Primer                                        | Sequence                                                   | Primer               | Sequence                                                      |
|-----------------------------------------------|------------------------------------------------------------|----------------------|---------------------------------------------------------------|
| <b><i>Gabra-α3</i> cloning and sequencing</b> |                                                            |                      |                                                               |
| Csi -5-1                                      | GACCACATTAAGTATCAGCG                                       | Csi -3-1             | GTGAAGTAGTTGACGGTGGCA                                         |
| Ain -5-1                                      | GACTACTCTGAGCATCAGCGC                                      | Ain -3-1             | CGTGAAGTAGTTGACCGCTGCA                                        |
| Cre -5-1                                      | ATGACCACACTGAGCATC                                         | Cre -3-1             | CCGCTTGGTGAAGTAGTTGA                                          |
| Cor -5-1                                      | ATGACCACATTAAGTATC                                         | Cor -3-1             | ACAAAGGCGTAGCACACAGC                                          |
| Universal primer-5-1                          | GG(A/G/T/C)GTCACCAC(A/G/T/C)GT(T/G)CT(T/G/A/C)AC(C/T)ATGAC | Universal primer-3-1 | AC(C/T)TT(C/T)TT(G/A/T/C)CC(A/G)TCCCAAGCCCA(G/A)CT            |
| <b>RNA editing analysis</b>                   |                                                            |                      |                                                               |
| Hsa3-wt-5-1                                   | TAATACGACTCACTATAGGGTGGCATATGCGACGGCCAT                    | Hsa3-wt-3-1          | AAGGCATAACAGACGGC                                             |
| Bta3-wt-5-1                                   | TAATACGACTCACTATAGGGTGGCATATGCGACGGCCATGGAT                | Bta3-wt-3-1          | AAGGCATAACACACGGC                                             |
| Gga1-mu-5-1                                   | TAATACGACTCACTATAGGGTGGCATACGCCACTGCCATGGA                 | Gga1-mu-3-1          | AAGGCATAGCACACCGC                                             |
| Dre5-mu-5-1                                   | TAATACGACTCACTATAGGGTGGCGTATGCTACCGCCATGGA                 | Dre5-mu-3-1          | AAGGCATAGCAGACCGC                                             |
| Mmu3-wt-5-1                                   | TAATACGACTCACTATAGGGTGGCATACGCGACGGCCAT                    | M1-5-1               | TAATACGACTCACTATAGGGTGGCATATGCGACGGCCATGGACGGCCATGGACAGGT     |
| M2-5-1                                        | TAATACGACTCACTATAGGGTGGCATATGCGACGGCCATGGACTCGT            | M3-5-1               | TAATACGACTCACTATAGGGTGGCATATGCGACGGCCATGGACTGCT               |
| M4-5-1                                        | TAATACGACTCACTATAGGGTGGCATATGCGACGGCCATGGACGGT             | M5-5-1               | TAATACGACTCACTATAGGGTGGCATATGCGACGGCCATGGACGGCCATGGACTTGC     |
| M6-5-1                                        | TAATACGACTCACTATAGGGTGGCATATGCGACGGCCATGGACTTGGCT          | M7-5-1               | TAATACGACTCACTATAGGGTGGCATATGCGACGGCCATGGACGGCCATGGCTGGTT     |
| M8-5-1                                        | TAATACGACTCACTATAGGGTGGCATATGCGACGGCCATGGACTGGTTTAT        | M9-5-1               | TAATACGACTCACTATAGGGTGGCATATGCGACGGCCATGGACGGCCATGGACTGGTTGAT |
| M10-5-1                                       | TAATACGACTCACTATAGGGTGGCATATGCGACGGCCATGGACTGGTTCAA        | M11-5-1              | TAATACGACTCACTATAGGGTGGCATATGCGACGGCCATGGACGGCCGTGGACTGGTTTAC |
| M12-5-1                                       | TAATACGACTCACTATAGGGTGGCATATGCGACGGCCATGGACTGGTTTCA        | M13-5-1              | TAATACGACTCACTATAGGGTGGCATATGCGACGGCCATGGACGGCAAT             |
| M14-5-1                                       | TAATACGACTCACTATAGGGTGGCATATGCGACGGCCAT                    | M15-5-1              | TAATACGACTCACTATAGGGTGGCATATGCGACGGCCATGGACGGCGAT             |
| M16-5-1                                       | TAATACGACTCACTATAGGGTGGCATATGCGACGGCCAT                    | M16-3-1              | AAGGCATAACAGACGGG                                             |
| M17-5-1                                       | TAATACGACTCACTATAGGGTGGCATATGCGACGGTCCAT                   | M17-3-1              | AAGGCATAACAGACGGT                                             |
| M18-5-1                                       | TAATACGACTCACTATAGGGTGGCATATGCGACGGCCAT                    | M18-3-1              | AAGGCATAACAGACGGA                                             |
| M19-5-1                                       | TAATACGACTCACTATAGGGTGGCATATGCGACGGTCCATGGACTGGTTTCA       | M20-5-1              | TAATACGACTCACTATAGGGTGGCATATGCGACGGTCCATGGACTGGTTTCA          |
| M21-5-1                                       | TAATACGACTCACTATAGGGTGGCATATGCGACGGCCATGGACTGGTTTCA        | M22-5-1              | TAATACGACTCACTATAGGGTGGCATATGCGACGGCCATGGACTGGTTTCA           |
| M23-5-1                                       | TAATACGACTCACTATAGGGTGGCATATGCGACGGCCAT                    | M23-3-1              | AAGGCATAACAGACCGC                                             |
| M26-5-1                                       | TAATACGACTCACTATAGGGTGGCATATGCGACGGCCAT                    | M26-3-1              | AAGGCATAACAGACAGC                                             |
| M27-5-1                                       | TAATACGACTCACTATAGGGTGGCTTATGCGACGGCCAT                    | M27-3-1              | AAGGCTTAACAGACGGC                                             |
| M29-5-1                                       | TAATACGACTCACTATAGGGTGGCATATGCGACGGCCAT                    | Mmu-M1-5-1           | TAATACGACTCACTATAGGGTGGCATACGTGACGGCCAT                       |
| Mmu-M1-3-1                                    | AAGGCATAACGGACGGC                                          | Mmu-M3-5-1           | TAATACGACTCACTATAGGGTGGCATACGCGACGGCCAT                       |
| Mmu-M3-3-1                                    | AAGGCATAGCGGACGGC                                          | Mmu-M4-5-1           | TAATACGACTCACTATAGGGTGGCATATGCGACGGCCAT                       |
| Mmu-M4-3-1                                    | AAGGCATAGCAGACGGC                                          | Mmu-M8-5-1           | TAATACGACTCACTATAGGGTGGCATACGCCACGGCCAT                       |
| D1-5-1                                        | TAATACGACTCACTATAGGGATGCGACGGCCAT                          | D1-3-1               | AACAGACGGCTATGAACCAAGTCCAT                                    |

---

|        |                                                |        |                           |
|--------|------------------------------------------------|--------|---------------------------|
| D2-5-1 | TAATACGACTCACTATAGGGTACGCGACGGCCAT             | D2-3-1 | AACAGACGGCTATGAACCAGTCCAT |
| D3-5-1 | TAATACGACTCACTATAGGGCGACGGCCATGGATTGG<br>TTCAT | D3-3-1 | ACACACGGCTATGAACCAAT      |
| D4-5-1 | TAATACGACTCACTATAGGGCGACGGCCATGGACTGG<br>TTCAT | D4-3-1 | AGACGGCTATGAACCAGTCCAT    |
| D5-5-1 | TAATACGACTCACTATAGGGACGGCCATGGATTGGTT<br>CAT   | D5-3-1 | CACGGCTATGAACCAAT         |
| D6-5-1 | TAATACGACTCACTATAGGGTCGGCCAT                   | D6-3-1 | ACGGCTATGAACCAATCCAT      |
| D7-5-1 | TAATACGACTCACTATAGGGGGCCAT                     | D7-3-1 | CGGCTATGAACCAATCCAT       |
| D8-5-1 | TAATACGACTCACTATAGGGCGCCAT                     | D8-3-1 | GGCTATGAACCAATCCAT        |

---
